# Supplementary material for: Identification of osmoadaptive strategies in the halophile, heterotrophic ciliate Schmidingerothrix salinarum
Source: PLoS Biol. 2018 Jan 22;16(1):e2003892. doi: 10.1371/journal.pbio.2003892 (PMC5794333; doi:10.1371/journal.pbio.2003892)
Supplement: S1 Data — (XLSX) [file pbio.2003892.s014.xlsx]

## Sheet: Figure 2
Figure 2
NaCl [mol/l]	glycine betaine	ectoine	total
0.855578	0.351607	0.0921206	0.443728
1.19781	0.719321	0.14104	0.860362
1.54004	0.567428	0.135619	0.703047
1.88227	0.851706	0.23108	1.08279
2.2245	1.22756	0.44878	1.67634
2.56674	1.19894	0.809046	2.00799
2.90897	1.21244	0.680483	1.89292
3.2512	1.93503	0.639323	2.57435
3.59343	6.3487	1.99576	8.34446

## Sheet: Figure 3
ECTOINE
day	T3		T7		T9
replicates	R1	R2	R1	R2	R1	R2
drop1	2	1	6	6	12	11
drop2	0	1	4	5	14	16
drop3	1	1	5	8	10	13
drop4	4	4	7	2	11	6
drop 5	1	0	4	8	13	12
mean	80	70	520	580	1200	1160
standard deviation	1.51658	1.51658	1.30384	2.48998	1.58114	3.64692
mean final	75		550		1180
standard deviation final	7.07107		42.4264		28.2843
GLYCINE BETAINE
day	T3		T7		T9
replicates	R1	R2	R1	R2	R1	R2
drop1	2	1	9	4	25	10
drop2	1	4	8	3	21	20
drop3	3	1	1	5	21	26
drop4	2	3	4	8	24	18
drop5	4	3	1	0	6	22
mean	48	48	230	200	970	960
standard deviation	1.14018	1.34164	3.78153	2.91548	7.70065	5.93296
mean final	48		215		965
standard deviation final	0		21.2132		7.07107
CHOLINE
day	T3		T7		T9
replicates	R1	R2	R1	R2	R1	R2
drop1	1	0	7	16	26	11
drop2	1	0	11	10	26	12
drop3	1	0	11	24	29	4
drop4	0	0	13	4	50	10
drop5	1	3	8	11	18	9
mean	40	30	500	650	2980	1840
standard deviation	0.447214	1.34164	2.44949	7.48331	12.0083	3.11448
mean final	35		575		2410
standard deviation final	7.07107		106.066		806.102
CONTROL
day	T3		T7		T9
replicates	R1	R2	R1	R2	R1	R2
drop1	0	0	3	1	5	4
drop2	0	0	3	1	1	9
drop3	0	0	5	5	1	3
drop4	1	0	6	3	1	5
drop5	1	0	1	2	3	5
mean	20	0	72	48	110	260
standard deviation	0.547723	0	1.94936	1.67332	1.78885	2.28035
mean final	10		60		185
standard deviation final	14.1421		16.9706		106.066
SUMMARY
	mean values			standard deviation
day	T3	T6	T9	T3	T6	T9
ectoine [cells/ml]	75	550	1180	7.07107	42.4264	28.2843
betaine [cells/ml]	48	215	965	0	21.2132	7.07107
choline [cells/ml]	35	575	2410	7.07107	106.066	806.102
control [cells/ml]	10	60	185	14.1421	16.9706	106.066
ectoine [cells/ml x10^3]	0.075	0.55	1.18	0.00707107	0.0424264	0.0282843
betaine [cells/ml x10^3]	0.048	0.215	0.965	0	0.0212132	0.00707107
choline [cells/ml x10^3]	0.035	0.575	2.41	0.00707107	0.106066	0.806102
control [cells/ml x10^3]	0.01	0.06	0.185	0.0141421	0.0169706	0.106066

## Sheet: Figure 4B
NMR Analysis
GLYCINE BETAINE					Figure 4B
					replicates	R1	R2	R3	mean	SD
salinity [%]	13				GB [%]	22.7807	22.7807	29.0934	24.885	3.64463
replicates	R1	R2	R3		13C2 GB [%]	69.4973	69.4973	62.1044	67.033	4.26832
area GB	0.02	0.06	1.21		Ect [%]	7.72193	7.72193	8.80219	8.08201	0.623694
area GB/proton	0.01	0.03	0.605
# cells	30600	46200	37800
c (GB) [mol/l]	0.175393	0.351434	8.73429
mean c (GB)	0.263414
13C2 GLYCINE BETAINE
salinity [%]	13
replicates | ppm	R1|3.73 ppm	R2|3.73 ppm	R3|3.73 ppm
area 13C2GB	0.03	0.09	1.27
area 13C2GB/proton	0.015	0.045	0.635
# cells	30600	46200	37800
c (GB) [mol/l]	0.326029	0.647823	11.1729
mean c (GB)	4.04893
Ectoine
salinity [%]	13
replicates	R1	R2	R3
area Ect	0.01	0.03	0.54
area Ect/proton	0.00333333	0.01	0.18
# cells	30600	46200	37800
c (GB) [mol/l]	0.0729559	0.14597	3.23345
mean c (GB)	0.109463

## Sheet: Figure 5
Figure 5A: Sodium imaging/cytoplasm
salinity [%]	4	9	13	17	21
salinity [mol/l]	0.684463	1.71116	2.2245	2.90897	3.76454
replicates
R1	42.866	24.7735	39.924	57.892	85.732
R2	55.514	43.483	39.37	43.349	79.736
R3	55.316	54.864	42.398	43.16	69.346
R4	39.287	58.737	36.302	37.918	108.625
R5	47.21	34.0042	54.711	76.271	106.061
R6	48.247	64.158	49.273	39.759	76.524
R7	17.8178	55.932	55.342	31.526	89.552
R8	51.572	56.211	69.333	50.135	93.522
R9	53.691	63.83	52.598	65.711	108.401
R10	55.523	64.281	57.729	27.237	69.535
mean	46.7044	52.0274	49.698	47.2958	88.7034
standard deviation	11.5896	13.5934	10.277	15.3749	15.2381
Figure 5B: Potassium imaging/cytoplasm
salinity [%]	4	10	21
salinity [mol/l]	0.684463	23.9443	7.28427
replicates
R1	20.25	20.7808	13.8066
R2	20.5652	19.5531	24.075
R3	23.5147	25.9861	22.8411
R4	15.9246	16.3664	19.847
R5	17.7542	14.569	15.719
R6	15.0623	15.72	23.2472
R7	15.9491	13.9945	19.5419
R8	15.1509	16.2846	15.6291
R9	13.1804	13.7024	15.1189
R10	14.366	13.4458	14.1918
mean	17.1717	17.0403	18.4018
standard deviation	3.28211	3.97979	3.98973

## Sheet: Figure 6
Fig. 6 A: E. coli MDH
0.05 M NaCl		1.2 M NaCl		2.4 M NaCl		2.5 M GB
oxalacetate [mM]	specific activity [U/mg]	oxalacetate [mM]	specific activity [U/mg]	oxalacetate [mM]	specific activity [U/mg]	oxalacetate [mM]	specific activity [U/mg]
0	0	0	0	0	0	0	0
0.005	317.581	0.005	9.12125	0.005	1.11235	0.005	38.1185
0.01	444.387	0.01	11.1235	0.01	2.22469	0.01	101.195
0.02	682.148	0.02	22.4694	0.02	4.67186	0.02	157.466
0.04	980.481	0.04	44.4939	0.04	11.2069	0.04	196.718
0.06	1080.68	0.06	63.4038	0.06	15.99	0.06	206.475
0.08	1164.95	0.08	73.9711	0.08	16.3515	0.08	222.585
0.1	1204.49	0.1	82.3137	0.1	23.3871	0.1	231.433
0.12	1165.1	0.12	95.6618	0.12	25.7786	0.12	234.837
Fig. 6 B: S. salinarum MDH
0.05 M NaCl		1.2 M NaCl		2.4 M NaCl		2.5 M GB
oxalacetate [mM]	specific activity [U/mg]	oxalacetate [mM]	specific activity [U/mg]	oxalacetate [mM]	specific activity [U/mg]	oxalacetate [mM]	specific activity [U/mg]
0	0	0	0	0	0	0	0
0.005	232.666	0.005	10.9505	0.005	8.59669	0.005	59.1701
0.01	508.471	0.01	12.6904	0.01	8.80138	0.01	167.719
0.02	669.004	0.02	22.8563	0.02	18.0121	0.02	202.626
0.04	1044.52	0.04	45.0985	0.04	19.7519	0.04	269.458
0.06	1274.36	0.06	69.0464	0.06	24.6643	0.06	330.544
0.08	1403.78	0.08	79.0077	0.08	32.7493	0.08	349.061
0.1	1511.27	0.1	99.3396	0.1	44.8256	0.1	407.38
0.12	1565.02	0.12	108.687	0.12	49.6357	0.12	433.346
Fig. 6 C: E. coli ICDH
0.05 M NaCl		1.2 M NaCl		2.4 M NaCl		2.5 M GB
isocitrate [mM]	specific activity [U/mg]	isocitrate [mM]	specific activity [U/mg]	isocitrate [mM]	specific activity [U/mg]	isocitrate [mM]	specific activity [U/mg]
0	0	0	0	0	0	0	0
0.01	4.10008	0.01	0.0308277	0.1	0.0826181	0.01	1.78307
0.02	12.1461	0.02	0.160304	0.2	0.207162	0.025	2.21466
0.033	21.5485	0.033	0.283614	0.4	0.398293	0.05	2.65365
0.0666	32.9548	0.066	0.548732	0.6	0.611621	0.1	3.17648
0.1	39.6752	0.1	0.801519	0.8	0.768225	0.2	2.8756
0.4	42.0798	0.2	1.63387	1	0.949492	0.4	3.03098
0.6	41.8331	0.4	3.19991	1.5	1.26763	0.6	3.12469
0.8	44.7001	0.6	4.03842	2	1.69614	1	3.14442
1	42.0798	0.8	5.15438			2	3.19375
1.5	42.7271	1.5	7.19518
2	39.6444	2	7.73774
Fig. 6 D: S. salinarum ICDH
0.05 M NaCl		1.2 M NaCl		2.4 M NaCl		2.5 M GB
isocitrate [mM]	specific activity [U/mg]	isocitrate [mM]	specific activity [U/mg]	isocitrate [mM]	specific activity [U/mg]	isocitrate [mM]	specific activity [U/mg]
0	0	0	0	0	0	0	0
0.01	1.75627	0.1	0.212366	0.1	0.0403226	0.01	1.10753
0.02	2.88978	0.2	0.396953	0.2	0.0645161	0.02	1.48029
0.033	4.49821	0.4	0.59319	0.4	0.107527	0.05	1.69355
0.0666	5.9319	0.6	0.760753	0.6	0.125448	0.1	2.09677
0.1	5.60932	0.8	0.743728	0.8	0.162186	0.2	2.05914
0.2	6.67563	1	0.943548	1	0.169355	0.6	2.23656
0.4	5.98566	1.5	1.17025	1.5	0.198925	1	2.39427
0.6	6.36201	2	1.15323	2	0.232079	2	2.72939
0.8	6.9086
1	6.1828
1.5	6.26344
2	6.25

## Sheet: S5_Fig
S5 Fig
A. Glycine betaine
salinity [%]		5	7	9	11	13	15	17	19	21
salinity [mol/l]		0.855578	1.19781	1.54004	1.88227	2.2245	2.56674	2.90897	3.2512	3.59343
	Replicates
GB [mol/l]	R1	0.421332	0.257808	0.518773	0.65496	1.1758	1.02417	1.21674	2.08508	5.48191
GB [mol/l]	R2	0.179554	0.621211	0.500884	1.06291	1.66818	1.28913	1.14341	1.53513	7.86636
GB [mol/l]	R3	0.208748	0.678076	0.287555	0.923771	1.24112	1.27663	0.884581	2.23004	5.21793
GB [mol/l]	R4	0.348213	1.09601	0.792386	0.688013	1.38216	1.05965	1.43645	1.73757	5.86829
GB [mol/l]	R5	0.257882	0.683954	0.808263	0.585524	0.970738	1.41893	1.97466	2.48224	6.39997
GB [mol/l]	R6	0.693915	0.97887	0.496704	1.19505	0.927383	1.08285	0.618785	1.54012	7.25774
mean		0.351607	0.719321	0.567428	0.851706	1.22756	1.19189	1.21244	1.93503	6.3487
sd		0.19018	0.2949	0.199366	0.246596	0.27458	0.158548	0.46816	0.390857	1.03856
B. Ectoine
salinity [%]		5	7	9	11	13	15	17	19	21
salinity [mol/l]		0.855578	1.19781	1.54004	1.88227	2.2245	2.56674	2.90897	3.2512	3.59343
	Replicates
Ect [mol/l]	R1	0.0842902	0.149517	0.190965	0.120548	0.306582	1.44795	0.496576	0.465371	1.47404
Ectoine [mol/l]	R2	0	0.151546	0.0921898	0.277148	0.61407	1.71192	0.447203	0.724896	2.4401
Ectoine [mol/l]	R3	0.0707906	0.254024	0	0.289041	0.554767	0.576621	0.553557	0.369486	2.44135
Ectoine [mol/l]	R4	0.119077	0.0764299	0.170987	0.126632	0.432466	0.40361	1.17249	0.872201	2.24564
Ectoine [mol/l]	R5	0.050018	0.195498	0.12645	0.192848	0.449979	0.398607	0.824637	0.627313	0.96716
Ectoine [mol/l]	R6	0.228548	0.0192273	0.233122	0.380261	0.334812	0.315564	0.588435	0.776674	2.40624
mean		0.0921206	0.14104	0.135619	0.23108	0.44878	0.809046	0.680483	0.639323	1.99576
sd		0.0776069	0.0835776	0.0826845	0.102299	0.120026	0.608896	0.274107	0.191643	0.625641

## Sheet: S6_Fig
S6 Fig
salinity [%]		5	7	9	11	13	15	17	19	21
	Replicates
∑ (GB+Ect)	R1	0.505623	0.407325	0.709738	0.775508	1.48238	2.47212	1.71331	2.55045	6.95595
	R2	0.179554	0.772757	0.593074	1.34006	2.28225	3.00105	1.59061	2.26003	10.3065
	R3	0.279539	0.9321	0.287555	1.21281	1.79589	1.85326	1.43814	2.59952	7.65928
	R4	0.46729	1.17244	0.963373	0.814644	1.81462	1.46326	2.60894	2.60977	8.11393
	R5	0.3079	0.879452	0.934713	0.778373	1.42072	1.81753	2.7993	3.10955	7.36713
	R6	0.922462	0.998098	0.729827	1.57532	1.2622	1.39842	1.20722	2.31679	9.66398
GB [%]	R1	83.3294	63.293	73.0936	84.4556	79.3183	41.4288	71.0167	81.7534	78.8089
	R2	100	80.3889	84.4556	79.3183	73.0936	42.9559	71.8848	67.9254	76.3245
	R3	74.6759	72.7471	100	76.1677	69.109	68.886	61.5088	85.7864	68.1256
	R4	74.5176	93.4811	82.2512	84.4556	76.1677	72.4172	55.0588	66.5794	72.3236
	R5	83.7551	77.7704	86.4718	75.2242	68.3273	78.0688	70.5413	79.8263	86.872
	R6	75.2242	98.0736	68.0579	75.8613	73.4738	77.4342	51.257	66.4763	75.1009
	MW	81.917	80.959	82.3884	79.2471	73.2483	63.5318	63.5446	74.7245	76.2593
	Stab	9.84223	12.9594	11.1615	4.27533	4.16635	16.8768	8.96083	8.69945	6.358
Ect [%]	R1	16.6706	36.707	26.9064	15.5444	20.6817	58.5712	28.9833	18.2466	21.1911
	R2	0	19.6111	15.5444	20.6817	26.9064	57.0441	28.1152	32.0746	23.6755
	R3	25.3241	27.2529	0	23.8323	30.891	31.114	38.4912	14.2136	31.8744
	R4	25.4824	6.51889	17.7488	15.5444	23.8323	27.5828	44.9412	33.4206	27.6764
	R5	16.2449	22.2296	13.5282	24.7758	31.6727	21.9312	29.4587	20.1737	13.128
	R6	24.7758	1.92639	31.9421	24.1387	26.5262	22.5658	48.743	33.5237	24.8991
	MW	18.083	19.041	17.6116	20.7529	26.7517	36.4682	36.4554	25.2755	23.7407
	Stab	9.84223	12.9594	11.1615	4.27533	4.16635	16.8768	8.96083	8.69945	6.358

## Sheet: S8_Fig
S8A Fig: Short-Time Sodium imaging/cytoplasm/5min
salinity [%]	4	5	8	10	12	14	16
salinity [mol/l]	0.684463	0.684463	1.36893	1.71116	2.05339	2.39562	2.73785
replicates
R1	12.0613	12.1657	4.86124	8.72213	10.4952	13.8138	12.7144
R2	14.4914	13.3561	12.8262	9.57857	7.3637	4.7588	8.75042
R3	18.3117	20.1276	17.7707	16.3775	19.0706	16.9365	7.55217
mean	14.9548	15.2165	11.8194	11.5594	12.3098	11.8363	9.67232
SD	3.15085	4.29461	6.51338	4.1945	6.06077	6.32507	2.70176
S8B Fig: Short-Time Sodium imaging/cytoplasm/10min
salinity [%]	4	10	16
salinity [mol/l]	0.684463	1.71116	2.73785
replicates
R1	9.76116	6.60556	6.12952
R2	7.94847	3.6536	7.40378
R3	12.0666	10.8992	13.1465
mean	9.92542	7.05277	8.89327
SD	2.06398	3.64342	3.73811
